# Supplementary material
Source: ML conference proceedings conference paper supplement (https://openaccess.thecvf.com/content/CVPR2024/html/Bao_GeneAvatar_Generic_Expression-Aware_CVPR_2024_paper.html)
Supplement: Supplementary file 1 [file Bao_GeneAvatar_Generic_Expression-Aware_CVPR_2024_supplemental.zip]

Archive with 6 entries (6 files):
- 12611_supp_README.txt
- __MACOSX/._12611_supp_README.txt
- 12611_supp.mp4
- __MACOSX/._12611_supp.mp4
- 12611_supp.pdf
- __MACOSX/._12611_supp.pdf
